# Supplementary material
Source: MDPI journal article supplement (https://www.mdpi.com/2072-4292/15/22/5428)
Supplement: s1 [file s1]

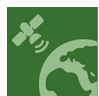

Supplementary Material

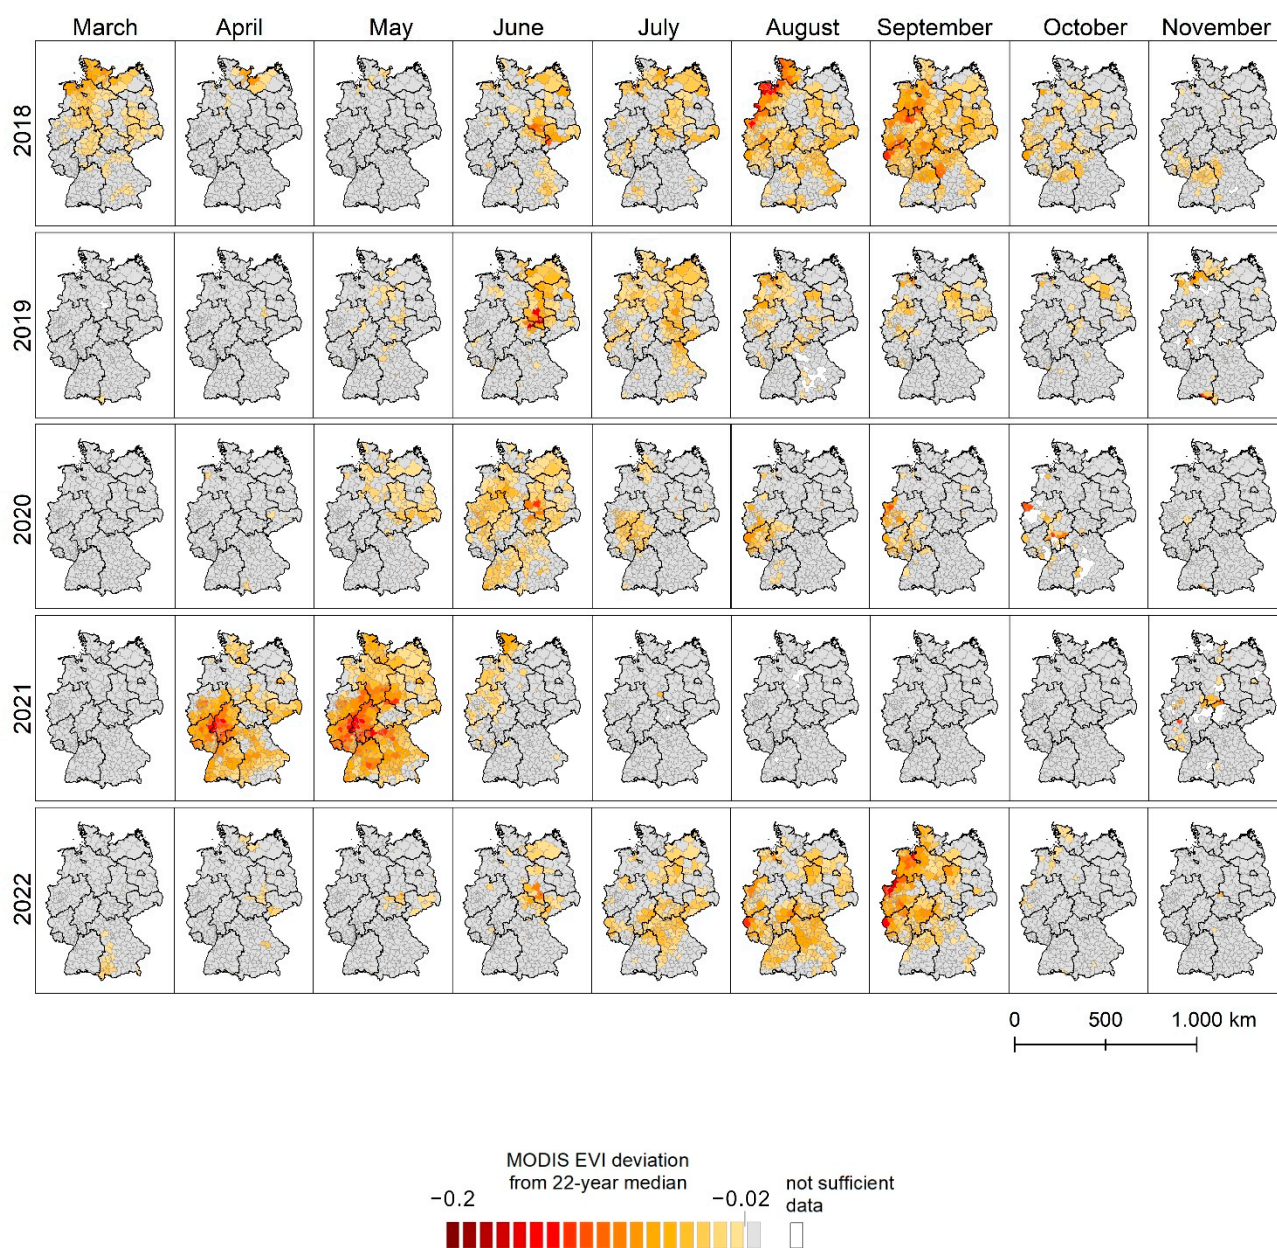

**Figure S1.** Monthly (Mar-Nov) maps of vegetation stress for grassland as indicated by MODIS-EVI deviations for 2018-2022 at county level.

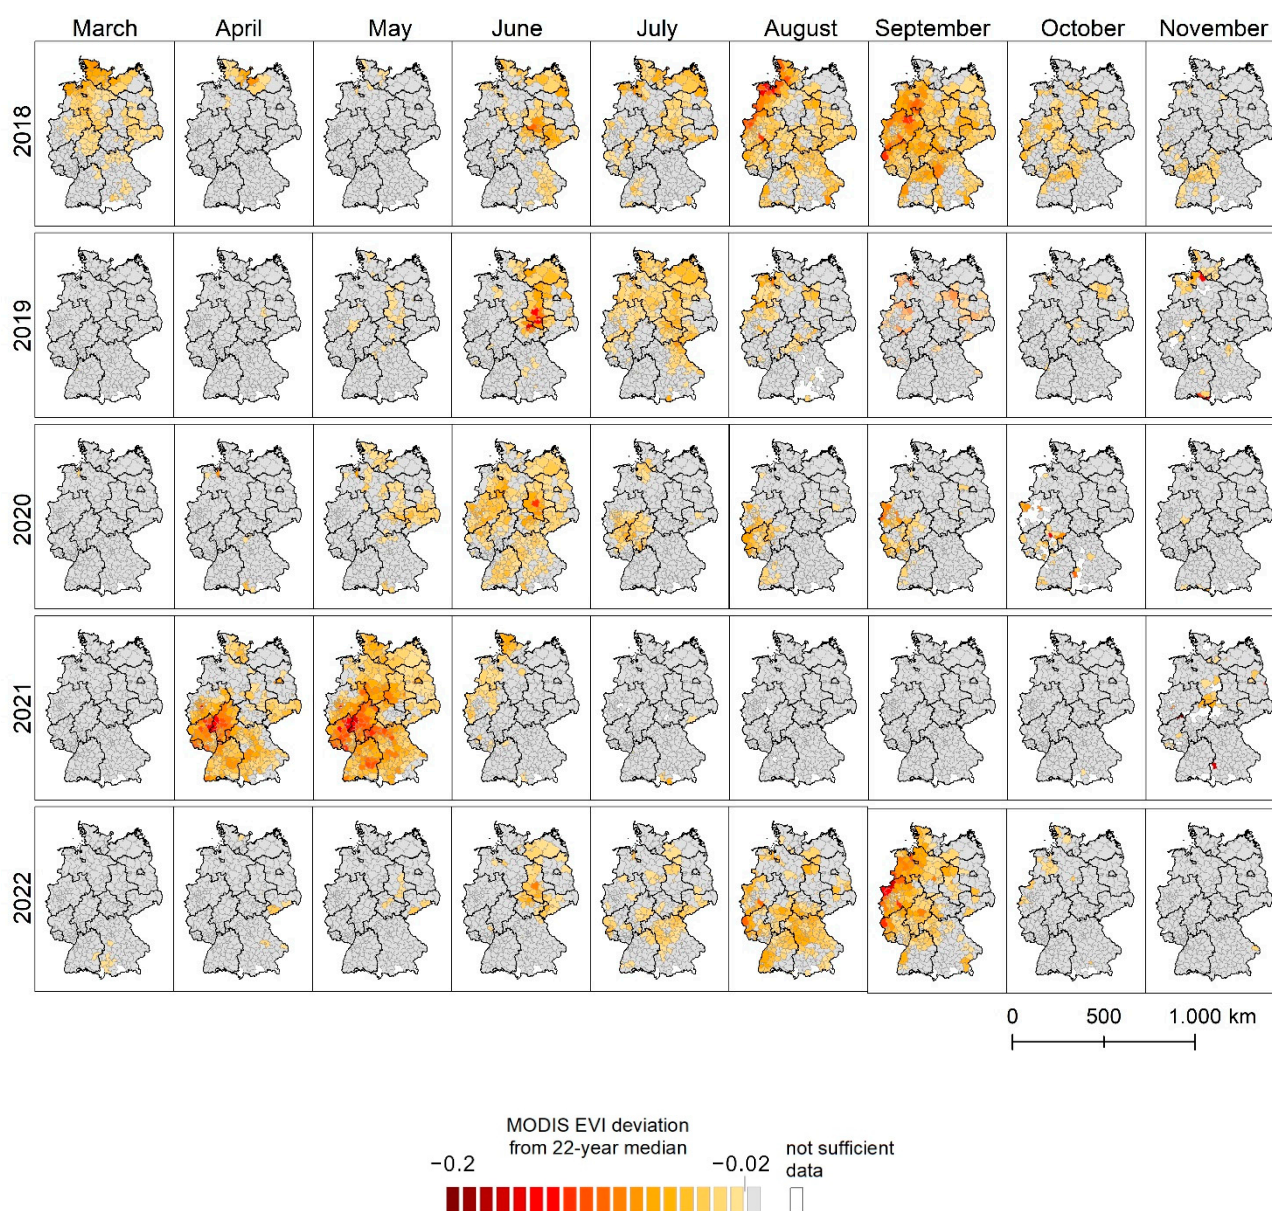

**Figure S2.** Monthly (Mar-Nov) maps of vegetation stress for cropland as indicated by MODIS-EVI deviations for 2018-2022 at county level.

**Table S1.** Indication of the two 16-day composites used to calculate monthly EVI deviations. In leap years, the start dates are one day earlier. The 16-day composite with starting date 23<sup>rd</sup> April is integrated in April in May.

| Month of the Vegetation Stress Monitor time series | Start date of MODIS 16-day composite 1 | Start date of MODIS 16-day-composite 2 |
|----------------------------------------------------|----------------------------------------|----------------------------------------|
| March                                              | 6 <sup>th</sup> March                  | 22 <sup>nd</sup> March                 |
| April                                              | 7 <sup>th</sup> April                  | 23 <sup>rd</sup> April                 |
| May                                                | 23 <sup>rd</sup> April                 | 9 <sup>th</sup> May                    |
| June                                               | 25 <sup>th</sup> May                   | 10 <sup>th</sup> June                  |
| July                                               | 26 <sup>th</sup> June                  | 12 <sup>th</sup> July                  |
| August                                             | 28 <sup>th</sup> July                  | 13 <sup>th</sup> August                |
| September                                          | 29 <sup>th</sup> August                | 14 <sup>th</sup> September             |
| October                                            | 30 <sup>th</sup> September             | 16 <sup>th</sup> October               |
| November                                           | 1 <sup>st</sup> November               | 17 <sup>th</sup> November              |
